# Supplementary figures and images for: Transcriptomic and Immunohistochemical Analysis of Progressive Keratoconus Reveal Altered WNT10A in Epithelium and Bowman's Layer
Source: PubMed Central journal article supplement — Invest Ophthalmol Vis Sci. 2021 May 14;62(6):16. doi: 10.1167/iovs.62.6.16 (PMC8132000; doi:10.1167/iovs.62.6.16), 2021-05-14

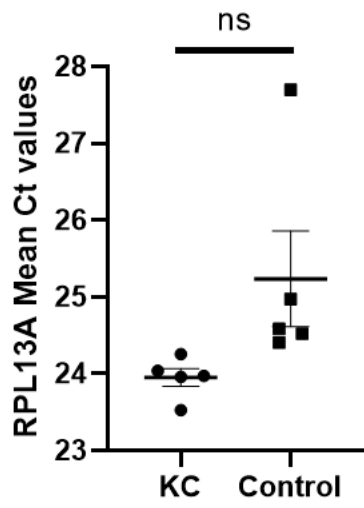

Supplemental Figure 1 - RPL13A equal expression

Supplement: iovs-62-6-16_s001.pdf [file iovs-62-6-16_s001.pdf]
